# Supplementary material for: The reactivity of diazabutadienes toward low oxidation state Group 13 iodides and the synthesis of a new gallium(i) carbene analogue
Source: Royal Society of Chemistry journal article supplement (doi:10.1039/b206605j), 2002-01-01
Supplement: b206605j.doc [file b206605j.doc]

**The Reactivity of Diazabutadienes Toward Low Oxidation State Group 13 Iodides and the Synthesis of a new Gallium(I) Carbene Analogue**

## Robert J. Baker, Robert D. Farley, Cameron Jones*, Marc Kloth and Damien M. Murphy

## SUPPLEMENTARY MATERIAL

**(a)**

**(b)**

Experimental EPR spectra for (a) compound **9** and (b) compound **7** recorded at room temperature in CD2Cl2 / C7D8 solutions.
